# Supplementary material for: High prevalence of fatigue in contemporary patients with multiple sclerosis
Source: PubMed Central journal article supplement — Mult Scler J Exp Transl Clin. 2021 Mar 18;7(1):2055217321999826. doi: 10.1177/2055217321999826 (PMC7985949; doi:10.1177/2055217321999826), 2021-03-18
Supplement: sj-pdf-4-mso-10.1177_2055217321999826.pdf [file sj-pdf-4-mso-10.1177_2055217321999826.pdf]

Supplementary table 1:

Patient characteristics – Participants (n 1454) compared to non-participants (n 1603)

|                                        | Participants  | Non-participants | p-value |
|----------------------------------------|---------------|------------------|---------|
|                                        | n=1454        | n=1603           |         |
| Sex, female – no (%)                   | 981 (70)      | 956 (71)         | 0.55    |
| Age – years                            | 51.8 ±13      | 53.9±14          | <0.001  |
| Years from onset –<br>median (IQR)     | 16 (8-25)     | 21 (13-30)       | <0.001  |
| Years from diagnosis –<br>median (IQR) | 10 (5-18)     | 16 (9-24)        | <0.001  |
| Relapsing onset, -no (%)               | 1194 (83)     | 1003 (63)        | <0.001  |
| Progressive onset,-no (%)              | 128 (8.9)     | 135 (8.4)        | <0.001  |
| EDSS, median (IQR)                     | 2.5 (1.5-3.0) | 2.5 (2-3)        | 0.08    |

Participants: Unclassified phenotype at onset 8.2% (n=118).

Non-participants: Unclassified phenotype at onset 28.4% (n=452).

EDSS = Expanded Disability Status Scale; IQR = inter quartile range
